# Supplementary material
Source: PubMed Central journal article supplement (PMC152286)
Supplement: pnas_0434590100_1.pdf [file pnas_0434590100_1.pdf]

## Supporting Material and Methods

**BAT-gal construct.** BAT-gal was constructed by fusing 7 TCF/LEF-binding sites upstream of a 0.13 kb (0.13-sia) fragment containing the minimal promoter-TATA box of *siamois* (1). We used this minimal promoter for two reasons: first, this fragment has already been shown to be inactive *in vivo* during the development of *Xenopus* embryos (1); second, *siamois* is not present in mammals, making BAT-gal a completely heterologous reporter system that may be less subject to regulatory mechanisms in mammalian cells. BAT-gal drives the expression of  $\beta$ -gal in the nucleus to enhance detection of the reporter. Multimerized LEF/TCF-binding sites were generated by ligating synthetic double-stranded oligonucleotides (5'-CAGAATCATCAAAGGACCT-3'). The mutant LEF/TCF reporter was generated similarly to BAT-gal but using oligonucleotides mutated in the LEF consensus (2).

**Analysis of BAT-gal in mutant mice.** BAT-gal mice carrying the APC(Min/+) mutation were generated by crossing male mice bearing a point mutation in the APC gene with BAT-gal transgenic females and pups were genotyped by using PCR (3). Adult animals were dissected and intestines opened and cleaned as previously described (4). The BAT-gal transgene on the LRP6 mutant background was obtained by crossing BAT-gal with LRP6<sup>+/-</sup> mice (5). The LRP6 mutation was identified by PCR on yolk-sac DNA.

**LacZ detection.** Dissected embryos, or vibratome sections, were washed in PBS, fixed for 30 min in 4% paraformaldehyde, and incubated in the 5-bromo-4-chloro-3-indolyl- $\beta$ -d-galactoside (X-Gal) staining solution for 4-16 h (6). Individual organs were dissected after fixation from embryos older than embryonic day (E)11.5 to enhance penetration of the staining solution.

**Histological analysis and immunohistochemistry.** *LacZ*-positive embryos and newborn and adult tissues were extensively washed in PBS after X-Gal staining and postfixed overnight in 4% paraformaldehyde in PBS at 4°C. The samples were then

dehydrated, embedded in paraffin and sectioned. Five-micrometer sections were stained sequentially with hematoxylin/eosin and mounted in Permount. For immunohistochemistry, embryos were fixed for 2 h in 4% paraformaldehyde in PBS at 4°C. Embryos were cryoprotected in 30% sucrose in PBS (overnight), included in OCT (Biotica, Cambridge, UK) and stored at -80°C before sectioning in a cryotome (5-15  $\mu$ m). Sections were incubated with the following primary antibodies: anti-platelet endothelial cell adhesion molecule (PECAM) (generous gift from A. Vecchi, Inst. Mario Negri, Milan) and anti- $\beta$ -gal (Molecular Probes) and analyzed by confocal microscopy (Bio-Rad).

***In situ* hybridization.** *In situ* hybridization was performed as described (7) by using sense and antisense cRNA transcribed from *lacZ*, *FGF8*, or *Tbx5* cDNA.

## References

1. Brannon, M., Gomperts, M., Sumoy, L., Moon, R. T. & Kimelman, D. (1997) *Genes Dev.* **11**, 2359-2370.
2. Korinek, V., Barker, N., Morin, P. J., van Wichen, D., de Weger, R., Kinzler, K. W., Vogelstein, B. & Clevers, H. (1997) *Science* **275**, 1784-1787.
3. Dietrich, W. F., Lander, E. S., Smith, J. S., Moser, A. R., Gould, K. A., Luongo, C., Borenstein, N. & Dove, W. (1993) *Cell* **75**, 631-639.
4. Hassan, A. B. & Howell, J. A. (2000) *Cancer Res.* **60**, 1070-1076.
5. Pinson, K. I., Brennan, J., Monkley, S., Avery, B. J. & Skarnes, W. C. (2000) *Nature* **407**, 535-538.
6. Byrne, C., Tainsky, M. & Fuchs, E. (1994) *Development* (Cambridge, UK) **120**, 2369-2383.
7. Belo, J. A., Bouwmeester, T., Leyns, L., Kertesz, N., Gallo, M., Follettie, M. & De Robertis, E. M. (1997) *Mech. Dev.* **68**, 45-57.
