# Supplementary material
Source: PubMed Central journal article supplement (PMC152286)
Supplement: pnas_0434590100_2.pdf [file pnas_0434590100_2.pdf]

**Fig. 6.**  $\beta$ -catenin activated transgene driving the expression of the nuclear  $\beta$ -galactosidase reporter (BAT-gal) activation is Wnt/ $\beta$ -catenin specific. 293T cells were transfected in triplicate in 24-well plates with 200 pg of BAT-gal and the following expression vectors: lane 1, empty pCS2; lane 2, pCS2- $\Delta$ N $\beta$ -catenin (constitutively active, N-terminally deleted  $\beta$ -catenin expression vector); lane 3, pCS2- $\Delta$ N $\beta$ -catenin + pCS2-dominant negative T cell factor (TCF)3 (compare with lane 2); lane 4, pCS2Wnt8; lane 5, constitutively active-ALK4 [transforming growth factor (TGF)/Nodal receptor]; lane 6, pCS2-FGF2. All plasmids were used at 0.5  $\mu$ g per well. Transfections were carried out by using the standard calcium phosphate procedure in the presence of 10% serum.
