# Supplementary material
Source: PubMed Central journal article supplement (PMC152286)

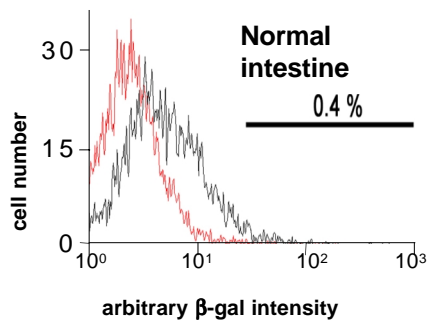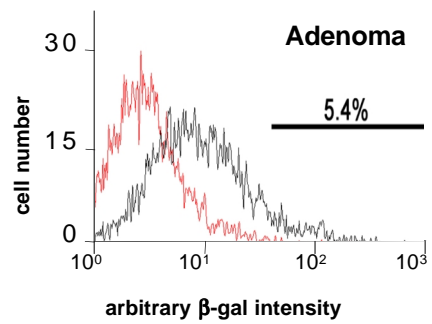

Supplement: pnas_0434590100_6.pdf [file pnas_0434590100_6.pdf]
